# Supplementary material
Source: HighWire-hosted journal article supplement (http://www.cmaj.ca/highwire/filestream/59224/field_highwire_adjunct_files/0/186_13.pdf)
Supplement: 186_13.pdf [file 186_13.pdf]

## ÉDITORIAL

## Attirer des touristes médicaux au Canada : une expérience risquée

Matthew B. Stanbrook MD PhD, John Fletcher MB BChir MPH

Pour la version anglaise de l'éditorial, veuillez consulter la page 971.

Voir l'article de presse à la page 977 et à [www.cmaj.ca/lookup/doi/10.1503/cmaj.1094874](http://www.cmaj.ca/lookup/doi/10.1503/cmaj.1094874)

Les hôpitaux canadiens sont des établissements de santé sans but lucratif financés en grande partie par les contribuables et, dans une moindre mesure, par des dons de bienfaisance. Voilà qui cadre bien avec l'objectif suivant : prendre soin de la population canadienne grâce à un régime de soins de santé public et universel garantissant des soins sans frais au point de service. Mais voici que, depuis peu, on demande aux Canadiens de laisser quelques grands hôpitaux du pays libérer des lits pour permettre à des patients étrangers de se faire soigner en accéléré, en payant les services. Bien qu'il s'agisse de programmes pilotes à petite échelle, ces initiatives suscitent tout de même une controverse : on se demande s'ils constituent une solution innovatrice pour assurer la pérennité des hôpitaux canadiens, ou s'ils marquent la fin d'un système de soins de santé public à payeur unique au Canada. Il faudrait réfléchir au problème et recueillir des preuves permettant de peser les éventuels bienfaits de cette pratique et les inquiétudes qu'elle suscite.

À l'heure actuelle, quatre grands hôpitaux universitaires de Toronto offrent un programme de soins aux patients étrangers; dans d'autres régions du Canada, on examine ce modèle de fourniture de soins de santé. En 2010, le ministre de la Santé de la Colombie-Britannique était émerveillé à l'idée que sa province allait devenir la « clinique Mayo du Nord » en attirant les touristes médicaux en provenance des États-Unis<sup>1</sup>; mais à ce jour, le gouvernement de cette province n'a fait aucun pas dans ce sens. Les autres provinces sont plus réfractaires, en particulier le Québec, dont le ministre de la Santé s'est montré farouchement opposé au tourisme médical, en révélant en 2013, que le Centre de santé de l'Université McGill de Montréal avait pratiqué une chirurgie cardiaque chez une patiente du Koweït moyennant une facture de plus de 100 000 \$.<sup>2</sup>

Les hôpitaux offrant des programmes de soins aux patients étrangers allèguent que ces programmes permettent au Canada d'offrir au monde son excellence en matière de soins de santé et qu'ils s'adressent aux patients provenant de pays où il n'existe pas de soins appropriés<sup>3,4</sup>. On fait valoir que la situation est similaire à celle des provinces qui assument les dépenses de patients allant se faire soigner aux États-Unis, lorsque ceux-ci n'ont pas accès à des soins adéquats ou que ces soins n'existent tout simplement pas dans ces provinces. Beaucoup d'opposants au tourisme médical sont d'accord

pour que le Canada fournisse des soins de santé humanitaires à des patients étrangers. Mais la distinction entre les deux cas n'est pas aussi claire que certains le prétendent. On pourrait considérer que la fourniture des soins de santé par le Réseau universitaire de santé de Toronto<sup>5</sup> aux victimes de la guerre civile en Libye est un exemple d'humanitarisme. Devrait-on voir la chose autrement, selon que les soins sont payés par le gouvernement libyen et constituent un bénéfice net pour l'hôpital, ou qu'ils sont offerts sans frais par un organisme de bienfaisance ou un hôpital et son personnel?

Les gestionnaires d'hôpitaux soutiennent que les restrictions budgétaires les obligent à chercher de nouvelles sources de revenus. Selon les estimations du personnel du Réseau universitaire de santé, les revenus découlant de son programme ont permis au réseau d'ouvrir un nouveau bloc opératoire et des lits d'hôpital qui, 85 % du temps, sont occupés par des patients canadiens. De plus, chaque patient étranger soigné au Canada lui permet de traiter deux patients canadiens en attente d'une chirurgie non urgente<sup>5</sup>.

Les critiques soulèvent plusieurs grandes inquiétudes qui méritent réflexion<sup>6,7</sup>. Notons en particulier l'argument selon lequel le recrutement de touristes médicaux transformera à tout jamais notre système de soins de santé et fera apparaître un système de santé à deux vitesses. Les craintes à l'égard d'un système à deux vitesses montrent peut-être que la question est abordée d'un point de vue uniquement canadien. Il y a longtemps que les É.-U. et les pays européens attirent des patients étrangers pour réaliser des profits. On ne devrait pas, toutefois, évaluer les modèles de soins de santé en les comparant aux systèmes entièrement privés, mais plutôt selon qu'ils permettent d'améliorer le système canadien de soins de santé dans son ensemble<sup>8</sup>. Cela dit, si les touristes médicaux deviennent une source de revenus importante pour l'hôpital, cette source de financement, conjuguée avec les fortes pressions exercées sur le marché du travail, pourrait déterminer la nature et l'ordre de priorité des activités de l'hôpital. De la même façon, certains professionnels de la santé faisant beaucoup d'argent en prodiguant des soins de santé à des patients étrangers le feront au détriment du système public.

Plus convaincant encore est l'argument selon lequel le tourisme médical constitue une solution à une crise inutile. Si le système de soins de santé canadien permet de fournir des soins privés à certains patients, cette capacité devrait per-

mettre de traiter des Canadiens en attente des mêmes services. Le tourisme médical ne doit pas permettre aux gouvernements de se dégager de leur responsabilité de financer adéquatement et d'une manière suffisante le système de santé pour que celui-ci réponde aux besoins de la population canadienne. Si nous croyons véritablement au mérite d'un système de santé public et universel, il est alors illogique de conclure que nous pourrions le maintenir en abandonnant ses principes de base.

Pour répondre à certaines préoccupations du public, le gouvernement ontarien a ordonné récemment la tenue d'une étude informelle sur les programmes de tourisme médical. Mais une évaluation à huis clos, sans critères clairs, ne peut pas convenir à une question si importante pour les Canadiens. Si les hôpitaux font l'expérience du tourisme médical, laissons alors une commission gouvernementale évaluer les répercussions d'un tel modèle — non seulement les effets sur les services hospitaliers concernés, mais ceux sur l'ensemble des activités hospitalières et de la prestation des soins de santé à la population canadienne. Il faudra faire des comparaisons appropriées avec des hôpitaux témoins n'offrant pas de programmes de tourisme médical. L'étude devra être effectuée de façon transparente, par des chercheurs indépendants compétents et les résultats devront être rendus publics. Il serait sage que les autres instances canadiennes attendent d'obtenir les résultats avant de mettre en œuvre leurs propres programmes de tourisme médical.

## Références

1. The Canadian Press. *B.C. to market health tourism*. CBC News, 9 mars 2010. Disponible : [www.cbc.ca/news/canada/british-columbia/b-c-to-market-health-tourism-1.917830](http://www.cbc.ca/news/canada/british-columbia/b-c-to-market-health-tourism-1.917830), (consulté le 7 août 2014).
2. *Government approves international patient's surgery, MUHC says*. CBC News, 1<sup>er</sup> février 2013. Disponible : [www.cbc.ca/news/canada/montreal/government-approves-international-patient-s-surgery-muhc-says-1.1317066](http://www.cbc.ca/news/canada/montreal/government-approves-international-patient-s-surgery-muhc-says-1.1317066), (consulté le 7 août 2014).
3. *International patient program*. Toronto : Sunnybrook Health Sciences Centre; 2014. Disponible : <http://sunnybrook.ca/content/?page=international-patient-program>, (consulté le 7 août 2014).
4. *For international patients & families: How do I apply?* Toronto (ON): University Health Network; 2014. Disponible : [www.uhn.ca/IHP/IPF/Pages/how\\_to\\_apply.aspx](http://www.uhn.ca/IHP/IPF/Pages/how_to_apply.aspx), (consulté le 7 août 2014).
5. Escaf M, Mahomed N. *Opinion: Caring for international patients improves care for Canadians*. Toronto : Healthydebate.ca; 2014. Disponible : <http://healthydebate.ca/opinions/medical-tourism-improves-care-for-canadians>, (consulté le 7 août 2014).
6. Turner L. Making Canada a destination for medical tourists: why Canadian provinces should not try to become "Mayo Clinics of the north." *Health Policy* 2012;7(4):18-25.
7. Dutt M. *Opinion: Medical tourism is bad business for Canadian hospitals*. Toronto : Healthydebate.ca; 2014. Disponible : <http://healthydebate.ca/opinions/medical-tourism-is-risky-business-for-canadian-hospitals>, (consulté le 7 août 2014).
8. Stanbrook MB, Attaran A, Flegel K, et al. It's time to take back the health care debate. *CMAJ* 2007;177:1157.

**Intérêts concurrents** : Se rendre à [www.cmaj.ca/site/misc/cmaj\\_staff.xhtml](http://www.cmaj.ca/site/misc/cmaj_staff.xhtml). Le Dr Matthew Stanbrook fait partie des médecins du Réseau universitaire de santé, mais ne prodigue pas de soins de santé dans le cadre du Programme de soins aux patients étrangers (*International Patient Program*).

**Affiliations** : Matthew Stanbrook est rédacteur adjoint et John Fletcher est rédacteur en chef du JAMC.

**Correspondance** à : Éditeur du JAMC, [pubs@cmaj.ca](mailto:pubs@cmaj.ca)

## RÉSUMÉS DE RECHERCHE

# Apnée obstructive du sommeil, prévalence du cancer et nouveaux cas de cancer

Tetyana Kendzerska MD PhD, Richard S. Leung MD PhD, Gillian Hawker MD MSc, George Tomlinson PhD, Andrea S. Gershon MD MSc

Pour la version anglaise de ce résumé, veuillez consulter la page 985.

**Contexte** : Il y aurait un lien entre l'apnée obstructive du sommeil et l'apparition ou la progression du cancer, possiblement en raison d'une hypoxémie chronique, bien qu'on ait peu de preuves de l'existence d'un tel lien. On s'est penché sur le lien qui pourrait exister entre la gravité de l'apnée obstructive du sommeil, la prévalence du cancer et les nouveaux cas de cancer, en tenant compte des facteurs de risque connus de cancer.

**Méthodologie** : On a recruté tous les patients adultes référés en raison d'une éventuelle apnée obstructive du sommeil, qui avaient pris part à une première étude diagnostique du sommeil réalisée dans un grand hôpital universitaire entre 1994 et 2010. Les données des patients ont été appariées à celles qui ont été recueillies dans les bases de données administratives sur la santé de l'Ontario entre

1991 et 2013. Les cas de cancer avéré étaient consignés dans le Registre d'inscription des cas de cancer de l'Ontario. À l'aide d'une méthode d'analyse de régression logistique, on a évalué l'association transversale entre l'apnée obstructive du sommeil et les nouveaux cas de cancer enregistrés au moment de l'étude du sommeil, ce qui a constitué le point de départ. À l'aide du modèle de régression linéaire de Cox, on a examiné le lien pouvant exister entre l'apnée obstructive du sommeil et les nouveaux cas de cancer chez les patients non atteints de cancer au point de départ.

**Résultats** : Des 10 149 patients ayant participé à une étude du sommeil, 520 (5,1 %) étaient atteints de cancer au point de départ. Au cours d'un suivi d'une durée médiane de 7,8 ans, 627 (6,5 %) des 9629 patients non atteints de cancer au point de départ ont présenté un nouveau can-

**Intérêts concurrents** : Aucun déclaré.

Cet article a été revu par les pairs.

**Correspondance** à : Tetyana Kendzerska, [tetyana.kendzerska@mail.utoronto.ca](mailto:tetyana.kendzerska@mail.utoronto.ca)
